# Supplementary material
Source: PubMed Central journal article supplement (PMC3416134)
Supplement: JVI.00789-12_zjv999096394so1.pdf [file JVI.00789-12_zjv999096394so1.pdf]

**Table S1. Sequence of the oligonucleotides used for the construction of pJLE-derived plasmids**

|          |                                                                                                               |
|----------|---------------------------------------------------------------------------------------------------------------|
| <b>1</b> | 5' GATCT <b>G</b> GGCCATTACGGCCTCTAGATTAGGCCGCCTCGGCCGGTAC 3'                                                 |
| <b>2</b> | 5' <u>CGGCCGAGGCGGCCT</u> AATCTAGAGGCCGTAATGGCCA 3'                                                           |
| <b>3</b> | 5' GATCT <b>G</b> GGCCATTACGGCCTCTAGATAAGGCCGCCTCGGCCGGTAC 3'                                                 |
| <b>4</b> | 5' <u>CGGCCGAGGCGGCCT</u> TATCTAGAGGCCGTAATGGCC <b>G</b> CA 3'                                                |
| <b>5</b> | 5' GATCT <u>GGCCATTACGGCCT</u> CTAGATAAGGCCGCCTCGGCCGGTAC 3'                                                  |
| <b>6</b> | 5' <u>CGGCCGAGGCGGCCT</u> TATCTAGAGGCCGTAATGGCCA 3'                                                           |
| <b>7</b> | 5'GATCTGGTGGCGGTTCTGGCGGTGGTTCTGGTGGCGGTTCCGGCGGTGGTT<br>CTGGCGGTGGCTCTGGTGGCGGCTCCGGTGGTGGTAGCTCTGGCGGTA 3'  |
| <b>8</b> | 5'GATCTACCGCCAGAGCTACCACCACCGGAGCCGCCACCAGAGCCACCGCC<br>AGAACCACCGCCGGAACCGCCACCAGAACCACCGCCAGAACCAGCCACCA 3' |

Underlined nucleotides are *Sfi*I restriction sites; bold nucleotides are additional nucleotides that allow expression of the cDNA in distinct reading-frames.
